# Supplementary material for: Insights into the nonlinear optical (NLO) response of pure Aum (2 ≥ m ≤ 7) and copper-doped Aum–xCux clusters
Source: Royal Society of Chemistry journal article supplement (doi:10.1039/d2ra03664a), 2022-01-01
Supplement: d2ra03664a1.pdf [file d2ra03664a1.pdf]

### Supporting Information

## **Insighting the nonlinear optical (NLO) response of pure $Au_m$ ( $2 \leq m \leq 7$ ) and copper doped $Au_m-xCu_x$ clusters**

Fakhar Hussain,<sup>a</sup> Riaz Hussain,<sup>\*a</sup> Muhammad Adnan,<sup>b</sup> Shabbir Muhammad,<sup>c</sup> Zobia Irshad,<sup>d</sup> Muhammad Usman Khan,<sup>a</sup> Junaid Yaqoob,<sup>a</sup> Khurshid Ayub<sup>e</sup>

**Table S1.** Comparison of shapes, theoretical and experimental bond length of pure gold and copper clusters.

| Gold Clusters | B3LYP/LanL2DZ <sup>1</sup>                                                          | CAM-B3LYP/LanL2DZ (Calculated)                                                      | Gold Experimental bond length [Ref.?) | Copper Clusters                                                                       | Copper Experimental bond length |
|---------------|-------------------------------------------------------------------------------------|-------------------------------------------------------------------------------------|---------------------------------------|---------------------------------------------------------------------------------------|---------------------------------|
| Au2           | 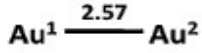   |    | 2.47Å <sup>2</sup>                    |    | 2.22Å <sup>3</sup>              |
| Au3           |    |    |                                       |    |                                 |
| Au4           |    |    |                                       |    |                                 |
| Au5           |   |   |                                       |   |                                 |
| Au6           |  |  |                                       |  |                                 |

**Table S2.** Comparison of Polarizability ( $\alpha$ ) and Hyper Polarizability ( $\beta$ ) of pure, thiol and citrate coated Au<sub>2</sub> clusters.

| Pure Gold Au <sub>2</sub>                                                                                                | Gold Au <sub>2</sub> -Thiol                                                                                                  | Gold Au <sub>2</sub> -Citrate                                                                                                   |
|--------------------------------------------------------------------------------------------------------------------------|------------------------------------------------------------------------------------------------------------------------------|---------------------------------------------------------------------------------------------------------------------------------|
| <br>$(\alpha)=78.86$<br>$(\beta)=11.45$ | <br>$(\alpha)=171.74$<br>$(\beta)=2015.73$  | <br>$(\alpha)= 176.75$<br>$(\beta)= 834.46$   |
|                                                                                                                          | <br>$(\alpha)=174.76$<br>$(\beta)=6930.75$ | <br>$(\alpha)= 155.16$<br>$(\beta)= 1354.17$ |

1. A. Y. Rogachev, X.-D. Wen and R. Hoffmann, *Journal of the American Chemical Society*, 2012, **134**, 8062-8065.
2. J. L. Jules and J. R. Lombardi, *The Journal of Physical Chemistry A*, 2003, **107**, 1268-1273.
3. D. G. Leopold, J. Ho and W. Lineberger, *The Journal of chemical physics*, 1987, **86**, 1715-1726.
